# Supplementary material for: Low-Dose Radiotherapy Reverses Tumor Immune Desertification and Resistance to Immunotherapy
Source: PubMed Central journal article supplement — Cancer Discov. 2021 Sep 3;12(1):108–33. doi: 10.1158/2159-8290.CD-21-0003 (PMC9401506; doi:10.1158/2159-8290.cd-21-0003), 2021-09-03
Supplement: cd-21-0003_figure_s1_suppsf1.pdf [file cd-21-0003_figure_s1_suppsf1.pdf]

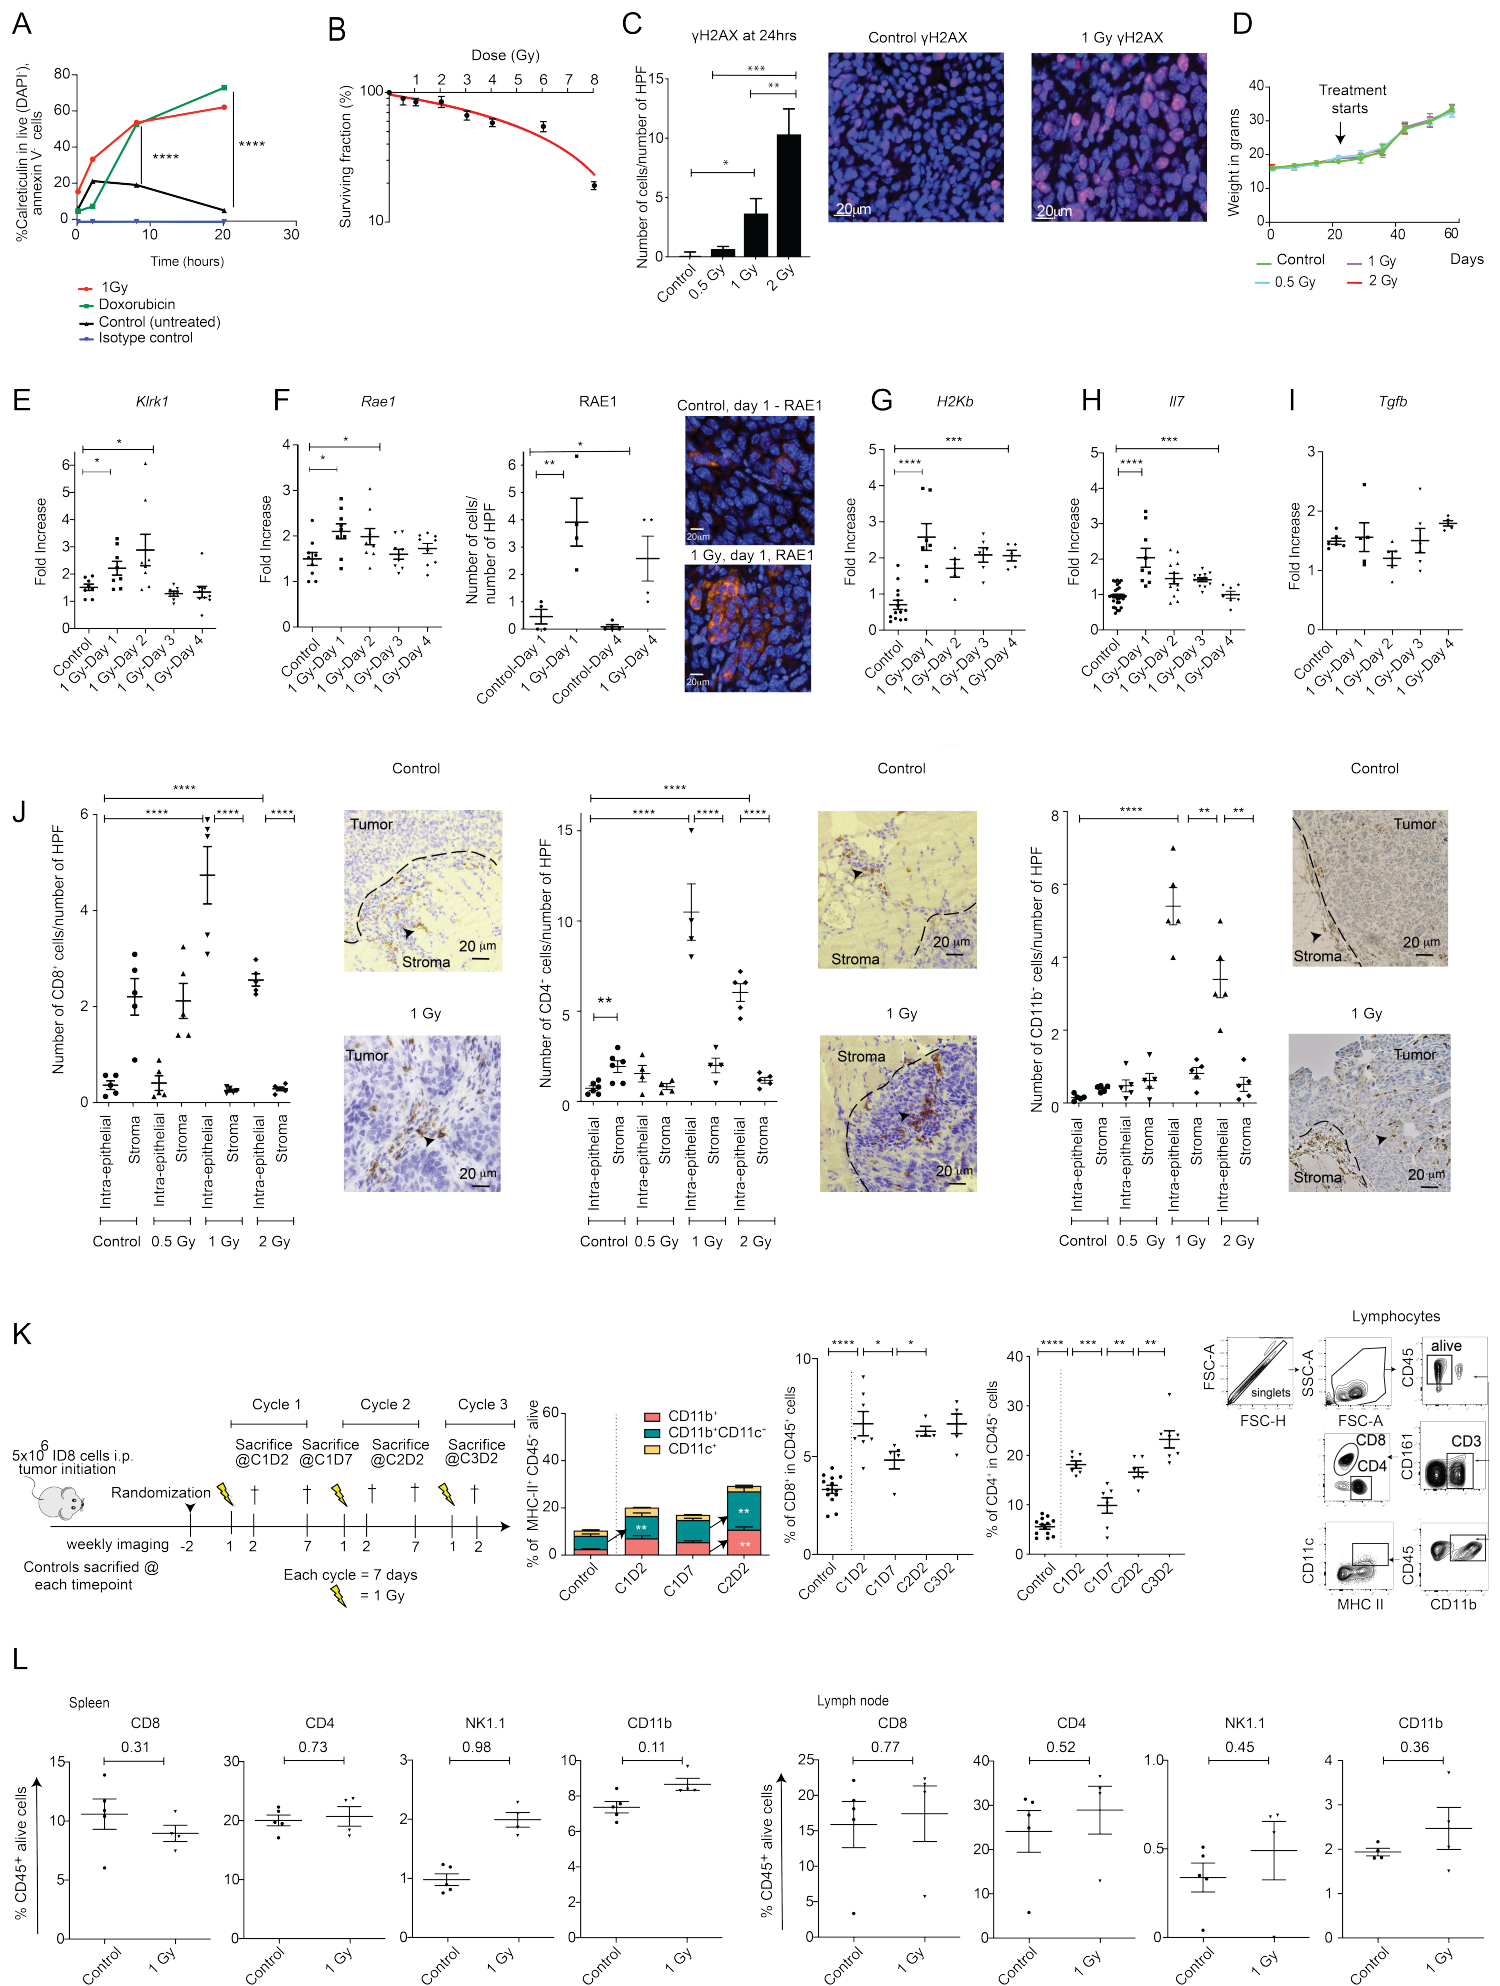

**Supplementary Fig. S1: Low-dose irradiation induces tumor cell stress and elicits immune cell infiltration in ID8 ovarian tumors** (A) *In vitro* immunogenic cell stress assay of ID8 cells and cell-surface expression of calreticulin (ecto-calreticulin) by flow cytometry ( $P < 0.0001 = ****$ ) over time. (B) *In vitro* clonogenic ID8 cell survival assay following treatment by increasing doses of irradiation. (C) Quantification of  $\gamma$ H2AX staining by immunofluorescence in LD-WART treated vs. control tumors at the indicated doses measured at 24hs. Five high-power fields (HPFs) were evaluated per slide. Right: representative tumoral  $\gamma$ H2AX staining (pink). (D) Average body weight of tumor-bearing mice treated by escalating doses of LD-WART vs. untreated. (E) mRNA levels of *Klrl1*. (F) mRNA levels of *rae1* (left) and protein expression by immunofluorescence staining (right) evaluated in five high-power fields (HPFs) per slide. Representative tumoral RAE1 staining (orange). (G-I) mRNA levels of *H2Kb*, *Il7*, *Tgfb*. (J) Representative immunohistochemical staining reveals CD8<sup>+</sup>, CD4<sup>+</sup>, and CD11b<sup>+</sup> immune cells in tumor and stroma compartment 5 days after the administration of different doses of LD-WART. Five HPF were evaluated per slide for 5 mice per group. (K) Low dose irradiation weekly treatment schedule and evaluation of immune infiltration at cycle 1 days 2 (C1D2) and 7 (C1D7) as well as C2D2 and C3D2. Immune cell phenotypes were evaluated on single cell suspensions of ID8 tumors treated with control or 1 Gy (n=5-12 mice per group) with representative gating strategy. Anti-CD45 was used to define the lymphocyte population and anti-CD3 to define total T cells. T cells were then further subdivided by anti-CD4 and anti-CD8 antibody staining, and anti-CD161 was used to identify NK or NKT cells. Myeloid cells were identified with anti-CD11b, anti-CD11c, and anti-MHC class II antibodies. (L) Frequency of CD8<sup>+</sup>, CD4<sup>+</sup>, NK1.1<sup>+</sup>, CD11b<sup>+</sup> cells in spleen and mesenteric lymph nodes measured by flow cytometry seven days after 1 Gy LD-WART. Data are representative of three independent experiments, each with n=5 mice per group. Statistical analysis was performed using Student's unpaired *t*-test, error bars represent mean  $\pm$  standard deviation. \*  $P \leq 0.05$ , \*\* $P < 0.01$ , \*\*\* $P < 0.001$ , \*\*\*\* $P < 0.0001$ .
