# Supplementary material for: Low-Dose Radiotherapy Reverses Tumor Immune Desertification and Resistance to Immunotherapy
Source: PubMed Central journal article supplement — Cancer Discov. 2021 Sep 3;12(1):108–33. doi: 10.1158/2159-8290.CD-21-0003 (PMC9401506; doi:10.1158/2159-8290.cd-21-0003), 2021-09-03
Supplement: cd-21-0003_figure_s3_suppsf3.pdf [file cd-21-0003_figure_s3_suppsf3.pdf]

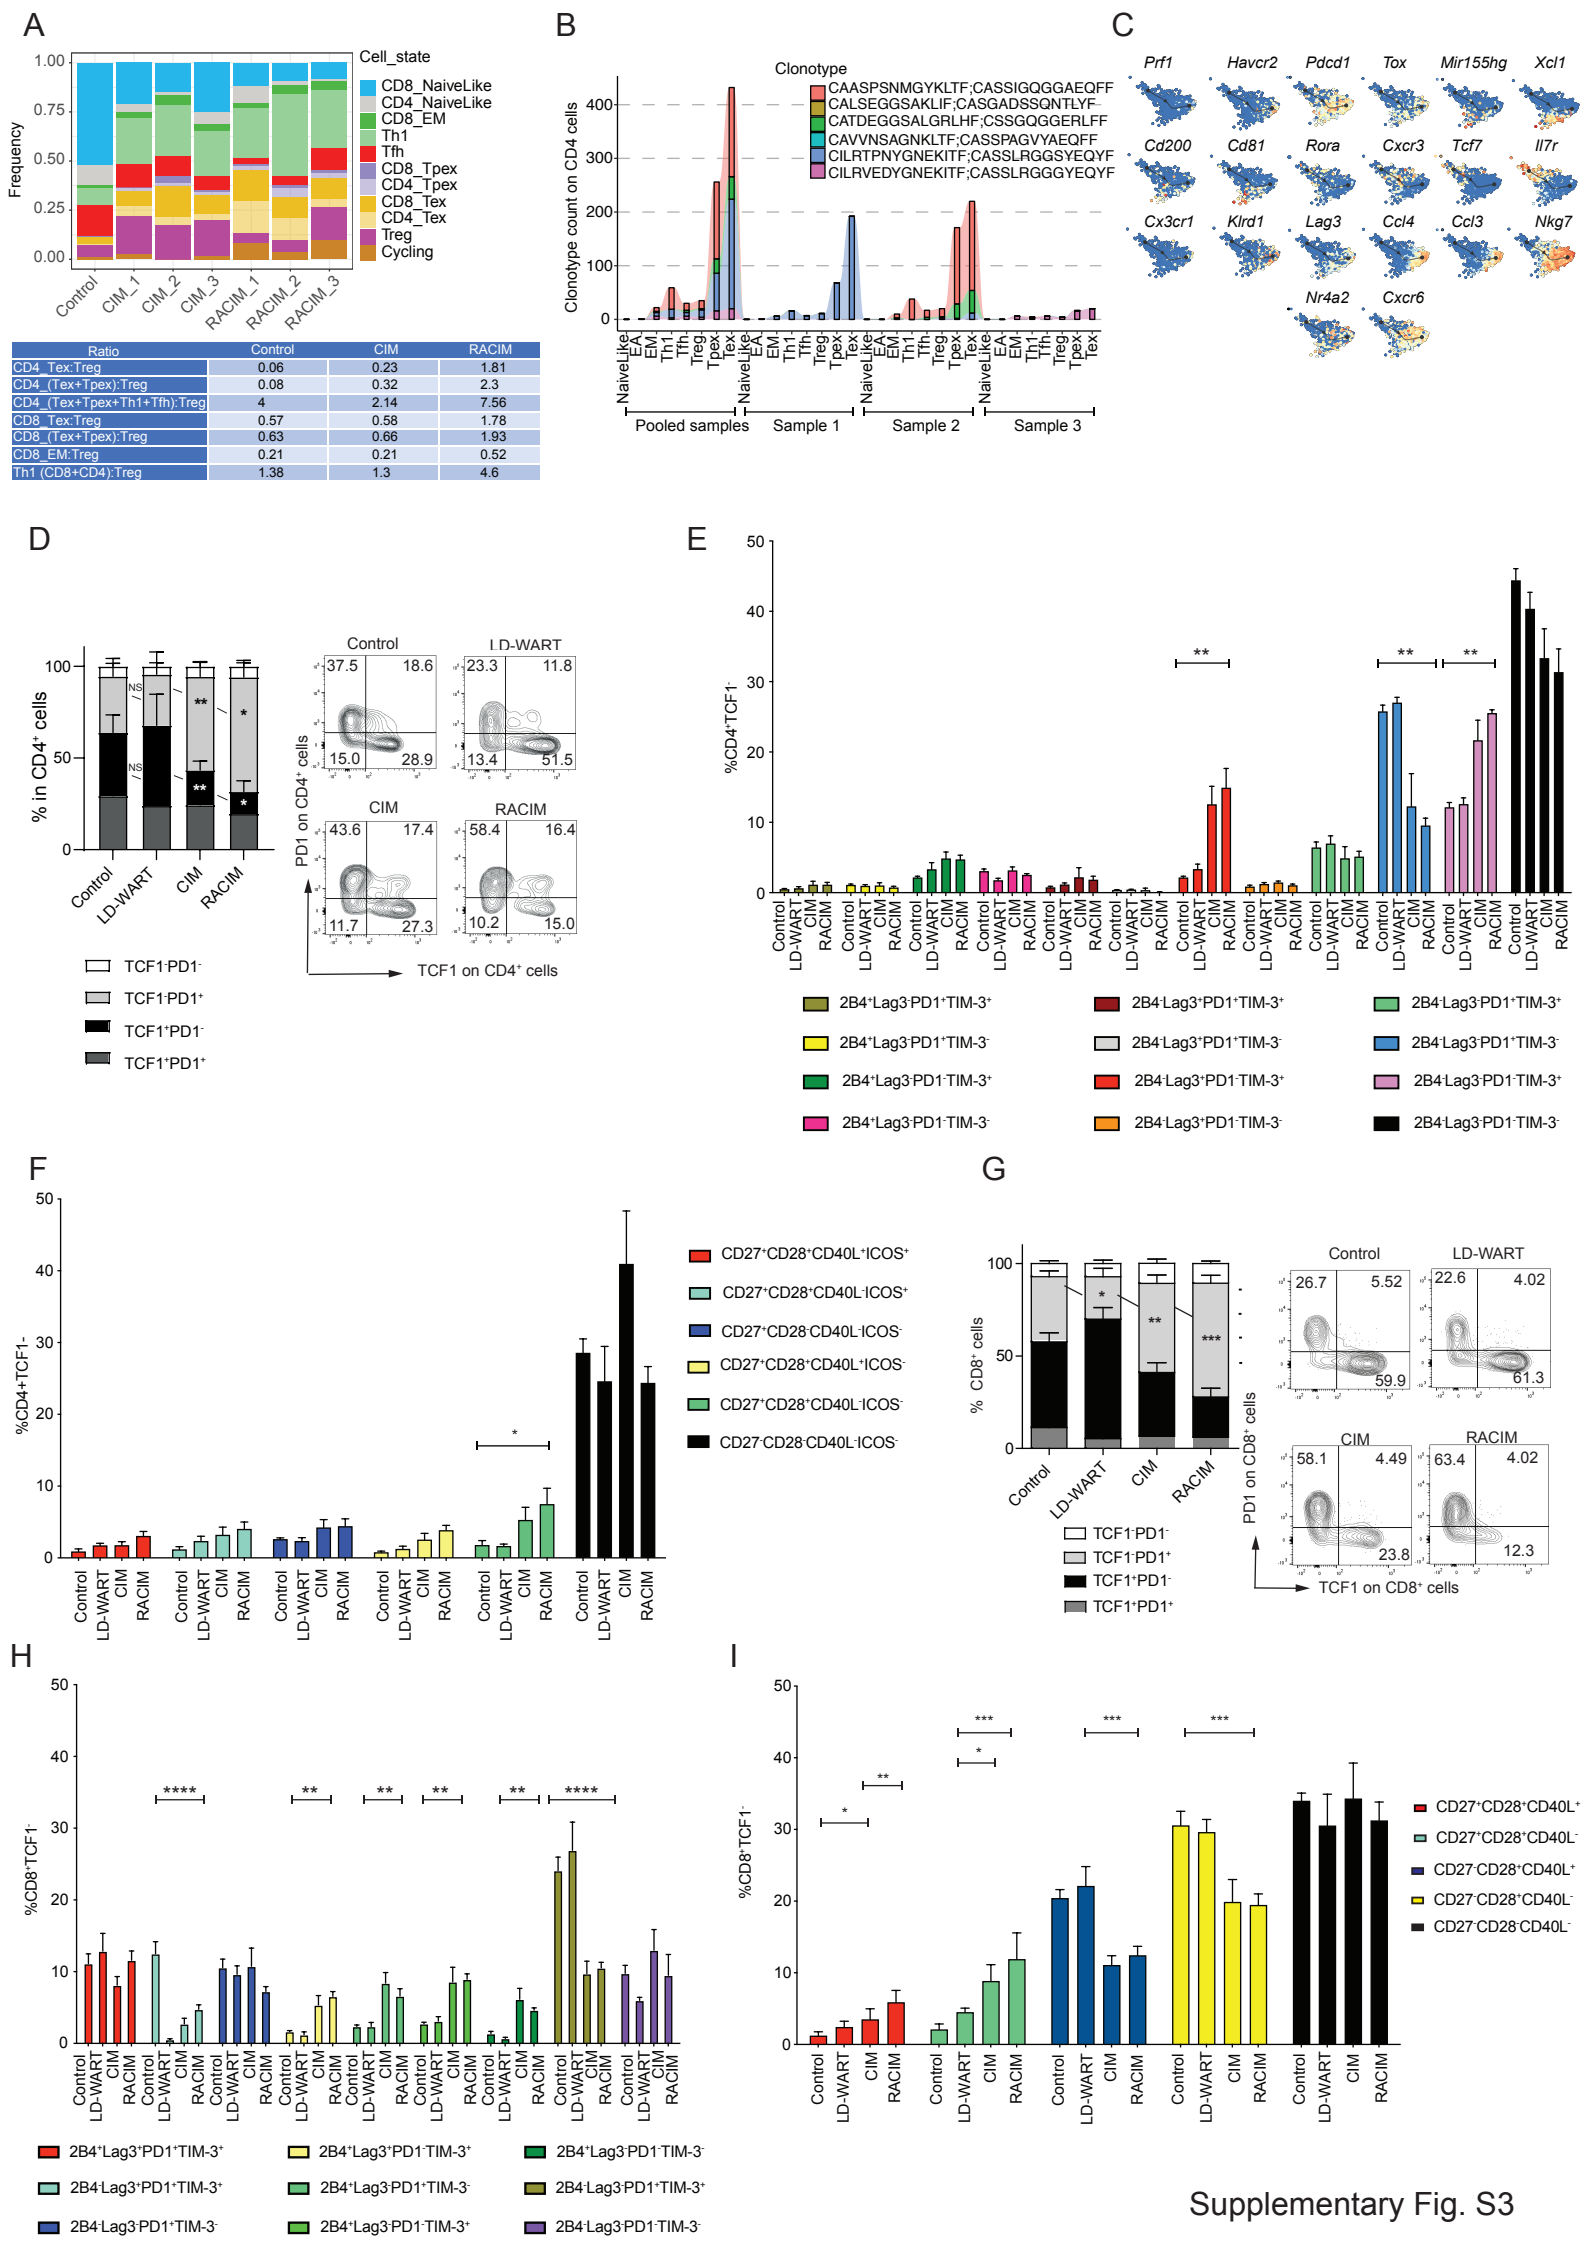

**Supplementary Fig. S3: Effect of therapy on CD4<sup>+</sup> and CD8<sup>+</sup> T cells infiltrating ID8 tumors.**

**(A)** Frequency of T-cell subsets by scRNAseq; precursor exhausted (Tpex), terminal exhausted (Tex), effector memory (EM), T helper 1 (Th1), T follicular helper (Tfh), regulatory T cell (Treg), and naïve like T cells in all three control tumors vs individual tumors (#1-3) from CIM or RACIM. Table describes CD8 and CD4:Treg ratios. **(B)** Bar plots representing the most clonally expanded CD4<sup>+</sup> T-cell clonotypes (by TCRseq) following RACIM (TCRs of all 3 tumors are shown in #1, vs. in individual tumors in #2-4). **(C)** Pseudotime trajectory analysis of CD4 clusters (as in Fig. 4F) showing the trajectory and gradual up/downregulation of indicated genes. **(D-E)** Immune cell phenotypes were evaluated on single cell suspensions of ID8 tumors treated with LD-WART, CIM or RACIM and control ID8 tumors. **(D)** Representative flow cytometry bar plot and gating strategy of TCF1<sup>-/+</sup>PD1<sup>+/-</sup> CD4<sup>+</sup> TILs. **(E)** Flow cytometric evaluation of co-expression of indicated inhibitory receptors on TCF1<sup>-</sup>PD1<sup>+</sup>CD4<sup>+</sup> TILs. **(F)** Histogram representing flow cytometry evaluation of cell-surface coexpression of indicated costimulatory receptors by TCF1<sup>-</sup>PD1<sup>+</sup>CD4<sup>+</sup> cells. **(G)** Flow cytometry evaluation TCF1<sup>-/+</sup>PD1<sup>+/-</sup> CD8<sup>+</sup> TIL subsets and representative gating strategy. **(H)** Histogram depicting co-expression of indicated co-inhibitory receptors on CD8<sup>+</sup> TCF1<sup>-</sup>PD1<sup>+</sup> TILs as evaluated by flow cytometry analysis. **(I)** Histogram depicting coexpression of indicated costimulatory receptors on CD8<sup>+</sup>TCF1<sup>-</sup>PD1<sup>+</sup> TILs as evaluated by flow cytometric analysis. Data are representative of 2 to 3 independent experiments with n=5 mice per group. Statistical analysis was performed using Student's unpaired *t*-test or Kruskal Wallis for multiple comparisons, error bars represent mean ± standard deviation. \**P* ≤ 0.05, \*\**P* < 0.01, \*\*\**P* < 0.001, \*\*\*\**P* < 0.0001.
