# Supplementary material for: Low-Dose Radiotherapy Reverses Tumor Immune Desertification and Resistance to Immunotherapy
Source: Oxford University Press journal article supplement (doi:10.1158/2159-8290.cd-21-0003), 2021-09-03
Supplement: cd-21-0003_table_s2_suppst2.docx [file cd-21-0003_table_s2_suppst2.docx]

**Supplementary Table S2. RACIN phase I study: Patient and tumor baseline characteristics per cohort**

| **Characteristic** | **Cohort 1 (n=3)** | **Cohort 2 (n=5)** | **All patients (n=8)** |
| --- | --- | --- | --- |
| ***Categorical characteristics*** | | | |
| **Gender - n (%)** |  |  |  |
| Male | 2 (66.7) | 4 (80.0) | 6 (75.0) |
| Female | 1 (33.3) | 1 (20.0) | 2 (25.0) |
| **Smoking history - n (%)** |  |  |  |
| Current | 1 (33.3) | - | 1 (12.5) |
| Former | 1 (33.3) | 2 (40.0) | 3 (37.5) |
| Never | 1 (33.3) | 1 (20.0) | 2 (25.0) |
| Unknown | - | 2 (40.0) | 2 (25.0) |
| **ECOG Performance status (screening) - n (%)** | | | |
| 0 | 2 (66.7) | 2 (40.0) | 4 (50.0) |
| 1 | 1 (33.3) | 3 (60.0) | 4 (50.0) |
| **TNM stage: M, n (%)** |  |  |  |
| M1 | 3 (100.0) | 5 (100.0) | 8 (100.0) |
| **Histology - n (%)** |  |  |  |
| Gallbladder carcinoma | 1 (33.3) | - | 1 (12.5) |
| High grade serous ovarian adenocarcinoma | 1 (33.3) | - | 1 (12.5) |
| Ovarian carcinoma | - | 1 (20.0) | 1 (12.5) |
| Prostate adenocarcinoma | 1 (33.3) | 3 (60.0) | 4 (50.0) |
| Colorectal cancer adenocarcinoma | - | 1 (20) | 1 (12.5) |
| **Tumor PDL1 status - n (%)** |  |  |  |
| **<1% of tumor cells** | 2 (66.66) | 5 (100) | 7 (87.5) |
| **>1% of tumor cells** | 1 (33.3) | 0 (0) | 1 (12.5) |
|  | 3 (100.0) | 5 (100.0) | 8 (100.0) |
| **Number of prior chemotherapy lines - n (%)** | | | |
| ≥3 | 2 (66.6) | 4 (80.0) | 6 (75.0) |
| <3 | 1 (33.3) | 1 (20.0) | 2 (25.0) |
| **Prior radiation therapy - n (%)** |  |  |  |
| Yes | - | 3 (60.0) | 3 (37.5) |
| No | 3 (100.0) | 2 (40.0) | 5 (62.5) |
| **Prior immune therapy - n (%)** | 0 (0.0) | 0 (0.0) | 0 (0.0) |
| ***Continuous characteristics*** | | | |
| **Age (years at consent)** |  |  |  |
| Mean | 66.3 | 63.4 | 64.5 |
| **BMI (screening)** |  |  |  |
| Mean | 25.3 | 22.9 | 23.8 |

Abbreviations: ECOG: Eastern Cooperative Oncology Group, TNM classification of malignant tumors (T: tumor size, N: lymph nodes, M: metastasis), PDL1: Programmed death-ligand 1 (PD-L1), BMI: body mass index, n: number of patients
