# Supplementary material for: Low-Dose Radiotherapy Reverses Tumor Immune Desertification and Resistance to Immunotherapy
Source: Oxford University Press journal article supplement (doi:10.1158/2159-8290.cd-21-0003), 2021-09-03
Supplement: cd-21-0003_table_s4_suppst4.docx [file cd-21-0003_table_s4_suppst4.docx]

**Supplementary Table S4. Antibodies and drugs used for *in vivo* studies**

| **Antibody** | **Clone** | **Concentration (μg)** | **Brand** |  |
| --- | --- | --- | --- | --- |
| anti-CD8 | 53-6.7 | 200 | BioXcell | (Bio X Cell Cat# BE0004-1, RRID:AB_1107671) |
| anti-CD4 | GK1.5 | 200 | BioXcell | (Bio X Cell Cat# BE0003-1, RRID:AB_1107636) |
| anti-NKG2D | HMG2D | 200 | BioXcell | (Bio X Cell Cat# BE0111, RRID:AB_10950118) |
| Mouse IgG2A | C1.18.4 | 200 | BioXcell | (Bio X Cell Cat# BE0085, RRID:AB_1107771) |
| Hamster IgG | Polyclonal | 200 | BioXcell | (Bio X Cell Cat# BE0091, RRID:AB_1107773) |
| Rat IgG1 | TNP6A7 | 200 | BioXcell | (Bio X Cell Cat# BE0290, RRID:AB_2687813) |
| Rat IgG2A | 2A3 | 200 | BioXcell | (Bio X Cell Cat# BE0089, RRID:AB_1107769) |
| Rat IgG2B | LTF2 | 200 | BioXcell | (Bio X Cell Cat# BE0090, RRID:AB_1107780) |
| anti-IFN- | XMG1.2 | 250 | BioXcell | (Bio X Cell Cat# BE0055, RRID:AB_1107694) |
| anti-IFN-AR | MAR1-5A3 | 1000 first injection then 500 | BioXcell | (Bio X Cell Cat# BE0241, RRID:AB_2687723 |
| FTY720 | Not applicable | 150 | Sigma-Aldrich | (Merck Cat#SML0700) |
