# Supplementary material for: Low-Dose Radiotherapy Reverses Tumor Immune Desertification and Resistance to Immunotherapy
Source: Oxford University Press journal article supplement (doi:10.1158/2159-8290.cd-21-0003), 2021-09-03
Supplement: cd-21-0003_table_s5_suppst5.docx [file cd-21-0003_table_s5_suppst5.docx]

**Supplementary Table S5. Antibodies used for flow cytometry analysis**

| **Antibodies** | **Clones** | **Fluorochrome/Label** | **Brand** |  |
| --- | --- | --- | --- | --- |
| CCR2 | SA203G11 | FITC | Biolegend | (BioLegend Cat# 150607, RRID:AB_2616979) |
| CD3 | 145-2C11  17A2 | PE/Cy7  PB | Biolegend  Biolegend | (BioLegend Cat# 100320, RRID:AB_312685)  (BioLegend Cat# 100214, RRID:AB_493645) |
| CD4 | GK1.5 | PB  PE/Dazzle594  APC/Cy7 | Biolegend | (BioLegend Cat# 100428, RRID:AB_493647)  (BioLegend Cat# 100456, RRID:AB_2565845)  (BioLegend Cat# 100414, RRID:AB_312699) |
| CD8a | 53-6.7 | BV711  FITC  PB | Biolegend | (BioLegend Cat# 100748, RRID:AB_2562100)  (BioLegend Cat# 100706, RRID:AB_312745)  (BioLegend Cat# 100725, RRID:AB_493425) |
| CD11b | M1/70 | PE/Cy7  PB | Biolegend | (BioLegend Cat# 101216, RRID:AB_312799)  (BioLegend Cat# 101224, RRID:AB_755986) |
| CD11c | N418 | FITC  PE  BV605 | Biolegend | (BioLegend Cat# 117306, RRID:AB_313775)  (BioLegend Cat# 117308, RRID:AB_313777)  (BioLegend Cat# 117334, RRID:AB_2562415) |
| CD27 | LG.3A10 | PerCP/Cy5.5 | Biolegend | (BioLegend Cat# 124214, RRID:AB_2275577) |
| CD28 | 37.51 | PerCP/Cy5.5  PE/Cy7  APC |  | (BioLegend Cat# 102114, RRID:AB_2073850)  (BioLegend Cat# 102126, RRID:AB_2617011)  (BioLegend Cat# 102110, RRID:AB_312875) |
| CD40 | 3/23 | APC  PB | Biolegend | (BioLegend Cat# 124612, RRID:AB_1134072)  (BioLegend Cat# 124626, RRID:AB_2561476) |
| CD45 | 30-F11 | BV650 | Biolegend | (BioLegend Cat# 155865, RRID:AB_2800695) |
| CD70 | FR70 | Biotin  PE  APC | Biolegend | (BioLegend Cat# 104603, RRID:AB_313116)  (BioLegend Cat# 104606, RRID:AB_2291343)  (BioLegend Cat# 104609, RRID:AB_2750464) |
| CD80 | 16-10A1 | PE/Dazzle594 | Biolegend | (BioLegend Cat# 104738, RRID:AB_2564175) |
| CD86 | GL-1 | FITC  APC  PE/Cy7  APC/Cy7 | Biolegend | (BioLegend Cat# 105006, RRID:AB_313149)  (BioLegend Cat# 105012, RRID:AB_493342)  (BioLegend Cat# 105014, RRID:AB_439783)  (BioLegend Cat# 105030, RRID:AB_2244452) |
| CD152 (CTLA4) | UC10-4B9 | BV605 | Biolegend | (BioLegend Cat# 106323, RRID:AB_2566467) |
| CD154 (CD40L) | MR1 | Biotin | Biolegend | (BioLegend Cat# 106503, RRID:AB_313268) |
| CD161(Nk1.1) | PK136 | PE | Biolegend | (BioLegend Cat# 106503, RRID:AB_313268) |
| CD206 (MMR) | C068C2 | PE/Dazzle594 | Biolegend | (BioLegend Cat# 141731, RRID:AB_2565931) |
| CD223 (Lag-3) | C9B7W | PerCP/Cy5.5  APC | Biolegend | (BioLegend Cat# 125212, RRID:AB_2561517)  (BioLegend Cat# 125210, RRID:AB_10639727) |
| CD244.2 (2B4) | 458.1 | PE/Cy7 | Biolegend | (BioLegend Cat# 133511, RRID:AB_2564338) |
| CD274 (PD-L1) | 10F.9G2 | BV711 | Biolegend | (BioLegend Cat# 124319, RRID:AB_2563619) |
| CD279 (PD1) | 29F.1A12  RMP1-30 | APC-Cy7  PerCP/Cy5.5 | Biolegend  Biolegend | (BioLegend Cat# 135224, RRID:AB_2563523)  (BioLegend Cat# 109120, RRID:AB_2566641) |
| CD366 (Tim-3) | RMT-3-23 | BV605, Pe | Biolegend | (BioLegend Cat# 109120, RRID:AB_2566641) |
| F4/80 | BM8 | APC/Cy7  PB | Biolegend | (BioLegend Cat# 123118, RRID:AB_893477)  (BioLegend Cat# 123124, RRID:AB_893475) |
| Ly-6C | HK1.4 | FITC  BV711 | Biolegend | (BioLegend Cat# 128006, RRID:AB_1186135)  (BioLegend Cat# 128037, RRID:AB_2562630) |
| Ly-6G | 1A8 | APC  PB | Biolegend | (BioLegend Cat# 127614, RRID:AB_2227348) (BioLegend Cat# 127612, RRID:AB_2251161) |
| MHC II | M5/001.15.2 | PerCP/Cy5.5 | Biolegend | (BioLegend Cat# 107624, RRID:AB_2191073) |
| NKG2D (CD314) | Cx5  A10  C7 | APC  PerCP/Cy5.5  PE-Dazzle594  PerCP-efluor710  Biotin  FITC  Biotin | Biolegend  Biolegend  Biolegend  eBioscience  eBioscience  Biolegend  Biolegend | (BioLegend Cat# 130212, RRID:AB_1236372)  (BioLegend Cat# 130208, RRID:AB_1227712)  (BioLegend Cat# 130214, RRID:AB_2728148)  (Thermo Fisher Scientific Cat# 46-5882-82, RRID:AB_2573789)  (Thermo Fisher Scientific Cat# 13-5872-82, RRID:AB_1210602)  (BioLegend Cat# 115711, RRID:AB_2133291)  (BioLegend Cat# 115703, RRID:AB_313664) |
| Rae-1 (Pan-Rae) | 186107 | AlexaFluor 594  AlexaFluor 647 | R&D systems  R&D systems | (R and D Systems, Cat# FAB17582T, RRID:AB_2888679)  (R and D Systems, Cat# FAB17582R, RRID:AB_2888680) |
| XCR1 | ZET | Biotin | Biolegend | (BioLegend Cat# 148212, RRID:AB_2564367) |
| **Intracellular** |  |  |  |  |
| Granzyme-B | GB11 | Alexa 647 | Biolegend | (BioLegend Cat# 515406, RRID:AB_2566333) |
| IFNg | XMG1.2 | PerCP/Cy5.5 | Biolegend | (BioLegend Cat# 505822, RRID:AB_961359) |
| IL-2 | JES6-5H4 | PE/Cy7 | Biolegend | (BioLegend Cat# 503832, RRID:AB_2561750) |
| Ki67 | 16A8 | APC  eFluor450 | Biolegend  eBioscience | (BioLegend Cat# 652406, RRID:AB_2561930)  (Thermo Fisher Scientific Cat# 48-5698-82, RRID:AB_11149124) |
| TCF-1 | C63D9 | Unlabeled  PE | Bioconcept | (Cell Signaling Technology Cat# 2203, RRID:AB_2199302)  (Cell Signaling Technology Cat# 14456, RRID:AB_2798483) |
| TNFa | MP6-XT22 | PB | Biolegend | (BioLegend Cat# 506318, RRID:AB_893639) |
| **Tox** | REA 473 | PE | Miltenyi Biotec | **Miltenyi Biotec Cat# 130-107-784, RRID:AB_2654223** |
| **Second step** |  |  |  |  |
| Anti-rabbit-IgG |  | PE,  AlexaFluor488  AlexaFluor647 | Bioconcept | (Cell Signaling Technology Cat# 8885, RRID:AB_2797677)  (Cell Signaling Technology Cat# 4412, RRID:AB_1904025)  (Cell Signaling Technology Cat# 4414, RRID:AB_10693544) |
| Streptavidin |  | PE  PerCP/Cy5.5  BV421  BV605  APC | Biolegend | (BioLegend Cat# 410503)  (BioLegend Cat# 405214)  (BioLegend Cat# 405225)  (BioLegend Cat# 405229)  (BioLegend Cat# 405207) |
